# Supplementary figures and images for: Conditioned CAR-T cells by hypoxia-inducible transcription amplification (HiTA) system significantly enhances systemic safety and retains antitumor efficacy
Source: HighWire-hosted journal article supplement (doi:10.1136/jitc-2021-002755), 2021-10-01

Figure S2

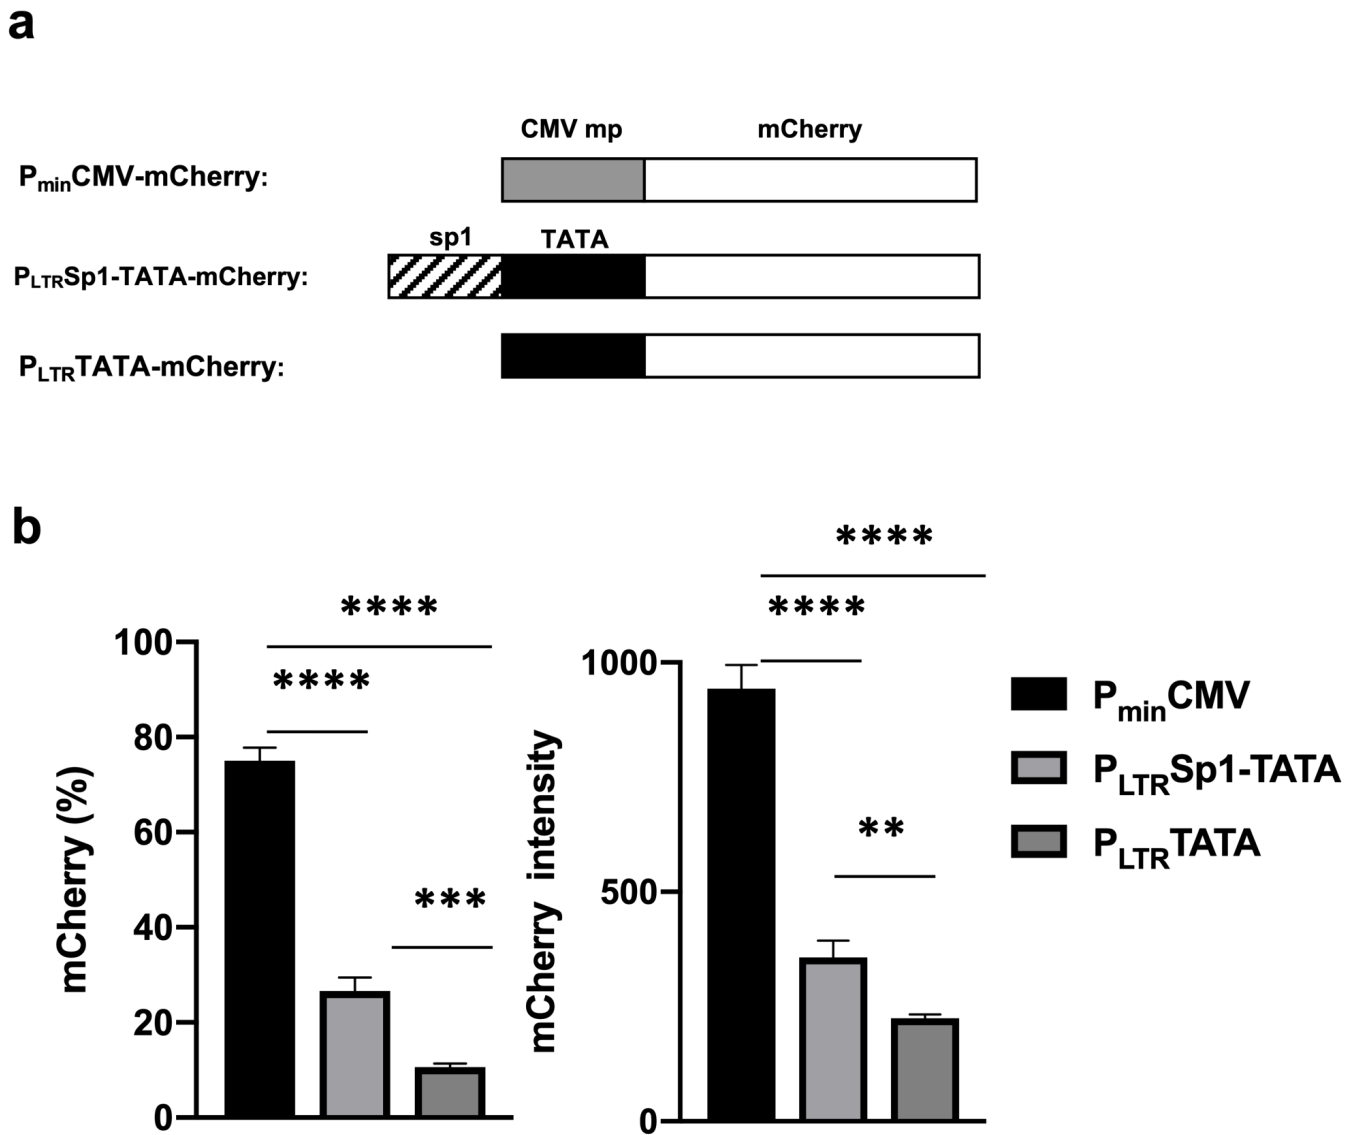

Supplement: jitc-2021-002755supp003_data_supplement.pdf [file jitc-2021-002755supp003_data_supplement.pdf]

Figure S4

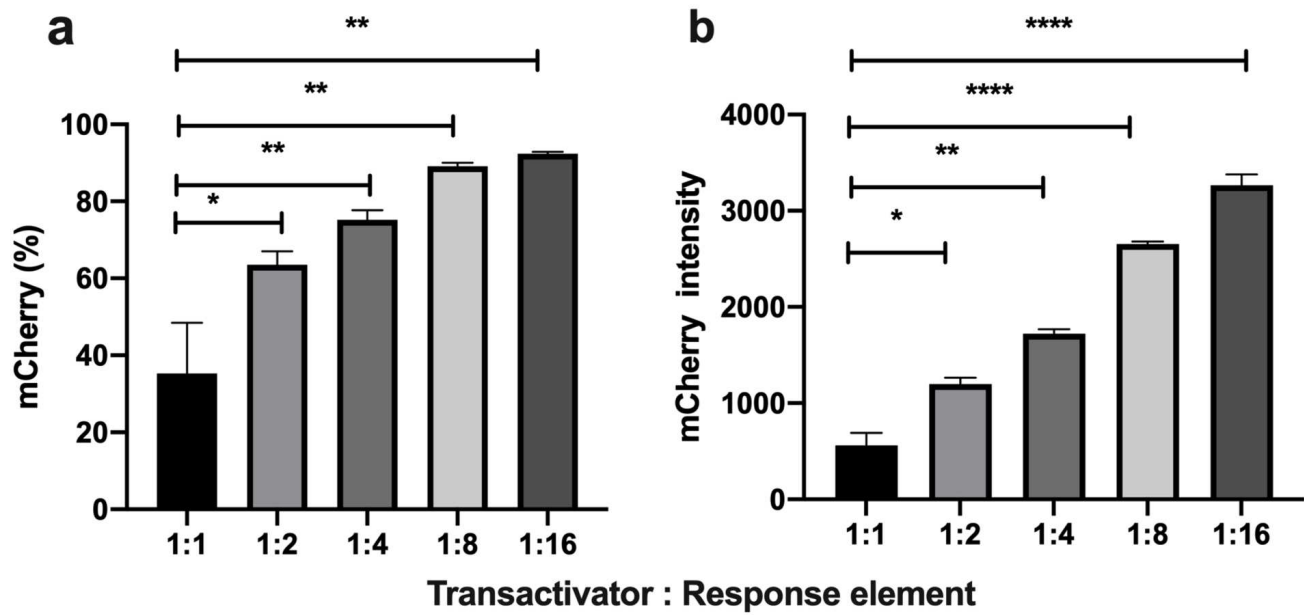

Supplement: jitc-2021-002755supp005_data_supplement.pdf [file jitc-2021-002755supp005_data_supplement.pdf]

Figure S5

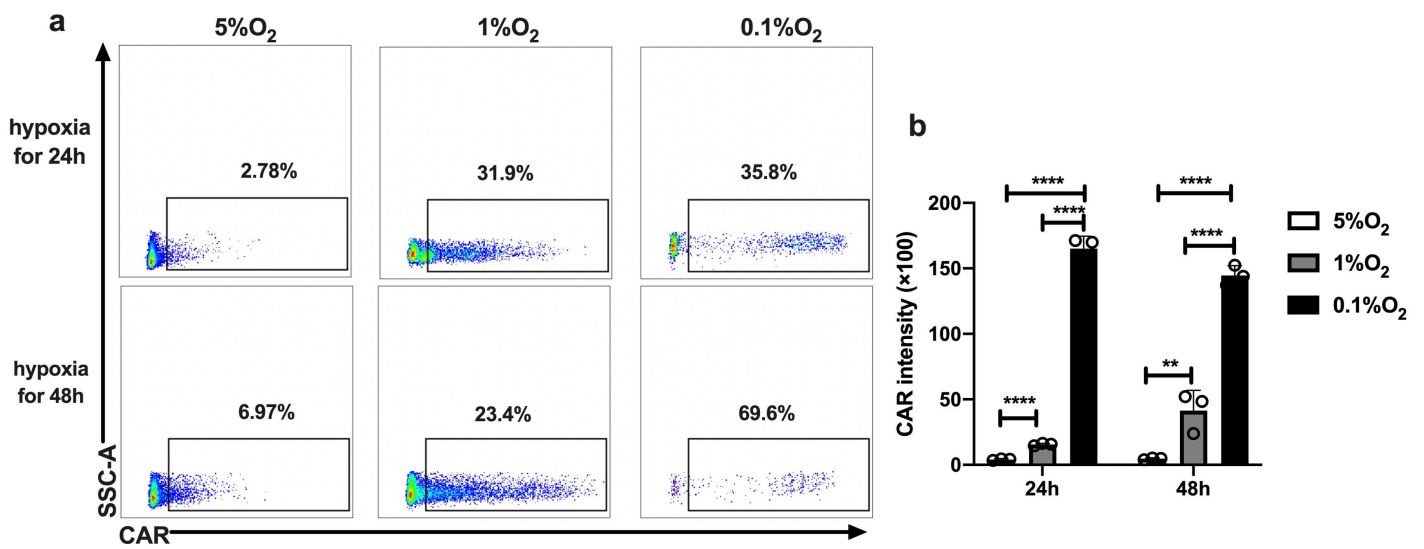

Supplement: jitc-2021-002755supp006_data_supplement.pdf [file jitc-2021-002755supp006_data_supplement.pdf]

Figure S6

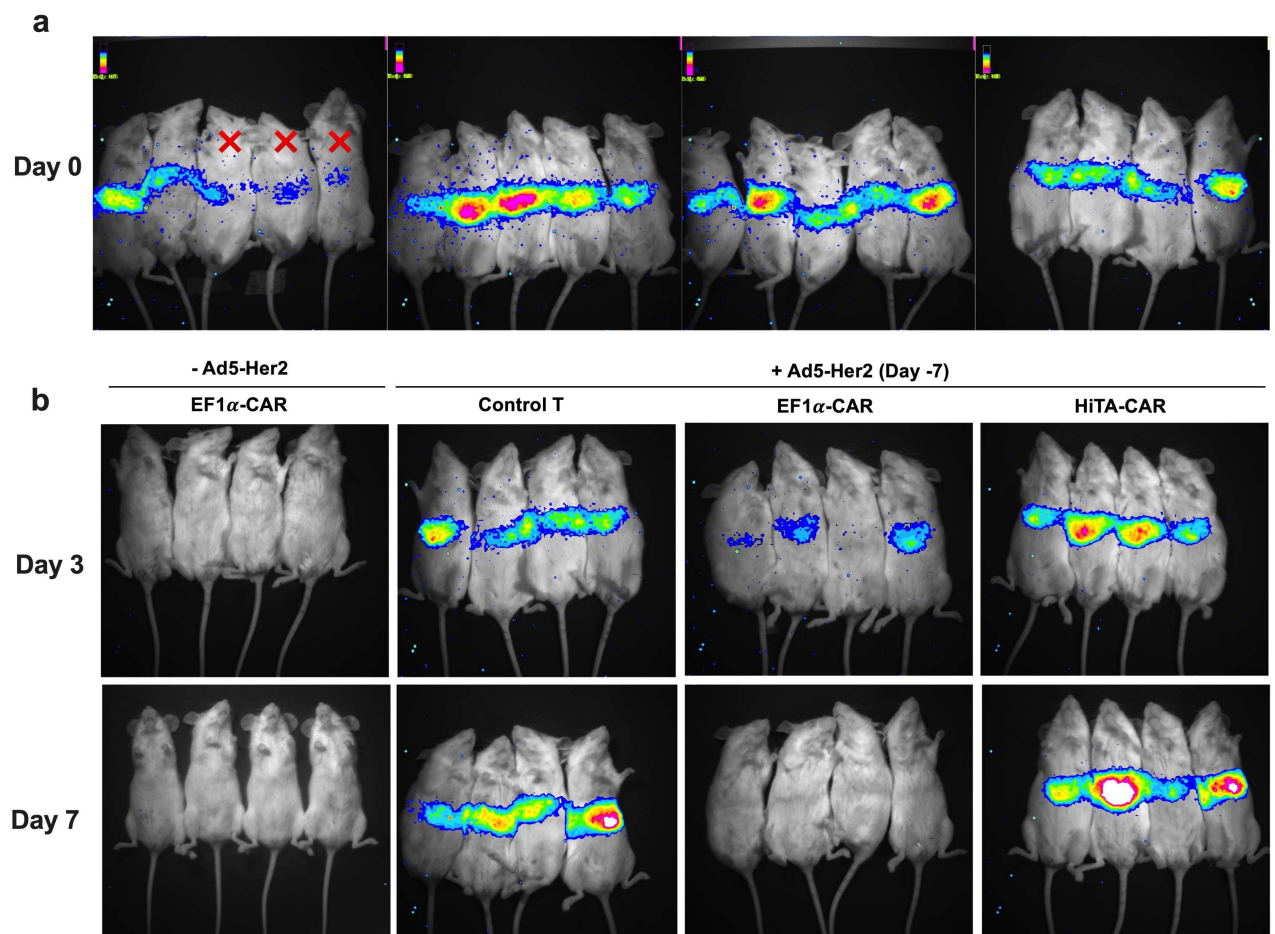

Supplement: jitc-2021-002755supp007_data_supplement.pdf [file jitc-2021-002755supp007_data_supplement.pdf]
