# Supplementary figures and images for: Conditioned CAR-T cells by hypoxia-inducible transcription amplification (HiTA) system significantly enhances systemic safety and retains antitumor efficacy
Source: PubMed Central journal article supplement — J Immunother Cancer. 2021 Oct 6;9(10):e002755. doi: 10.1136/jitc-2021-002755 (PMC8496395; doi:10.1136/jitc-2021-002755), 2021-10-06

Figure S7

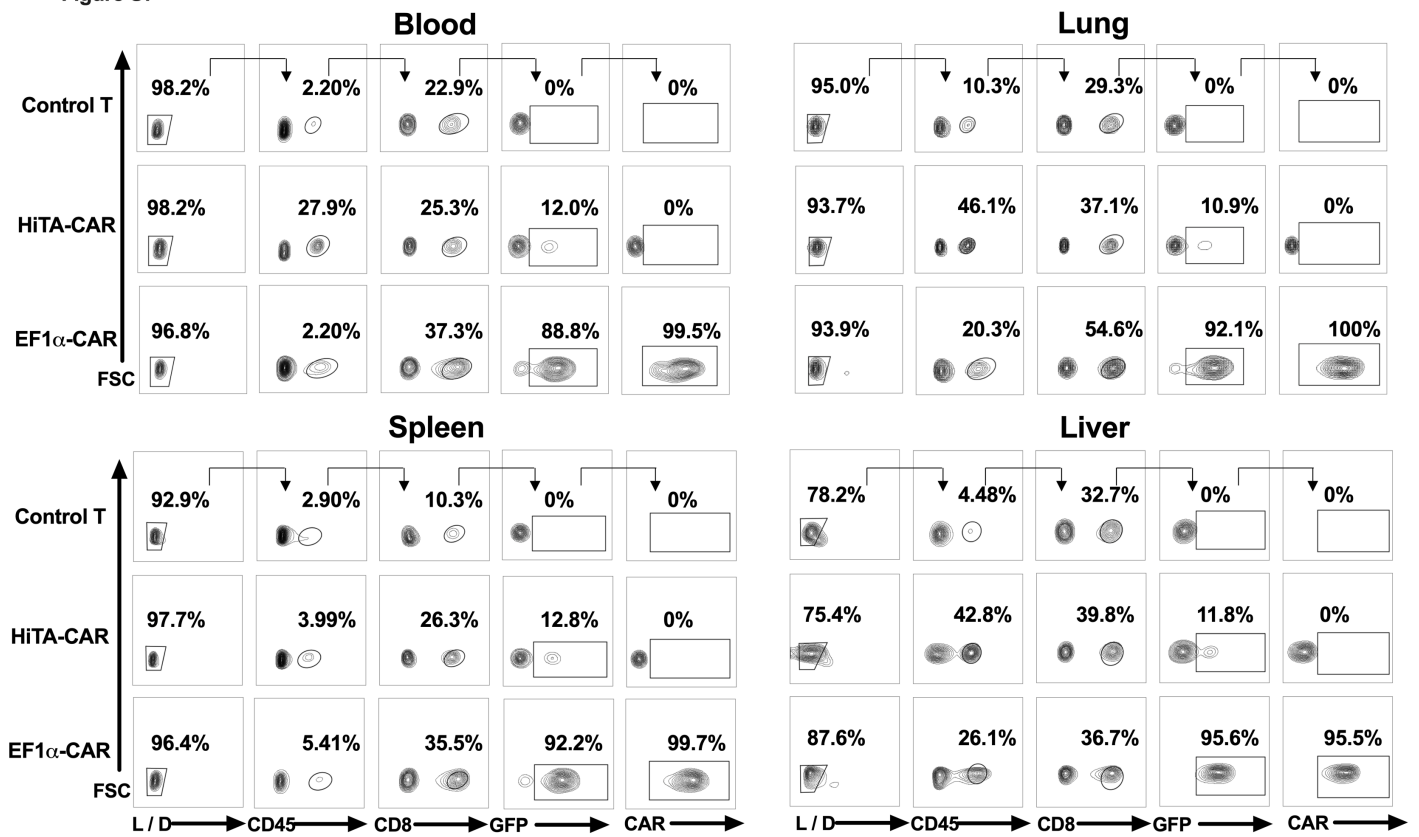

Supplement: jitc-2021-002755supp008.pdf [file jitc-2021-002755supp008.pdf]

Figure S8

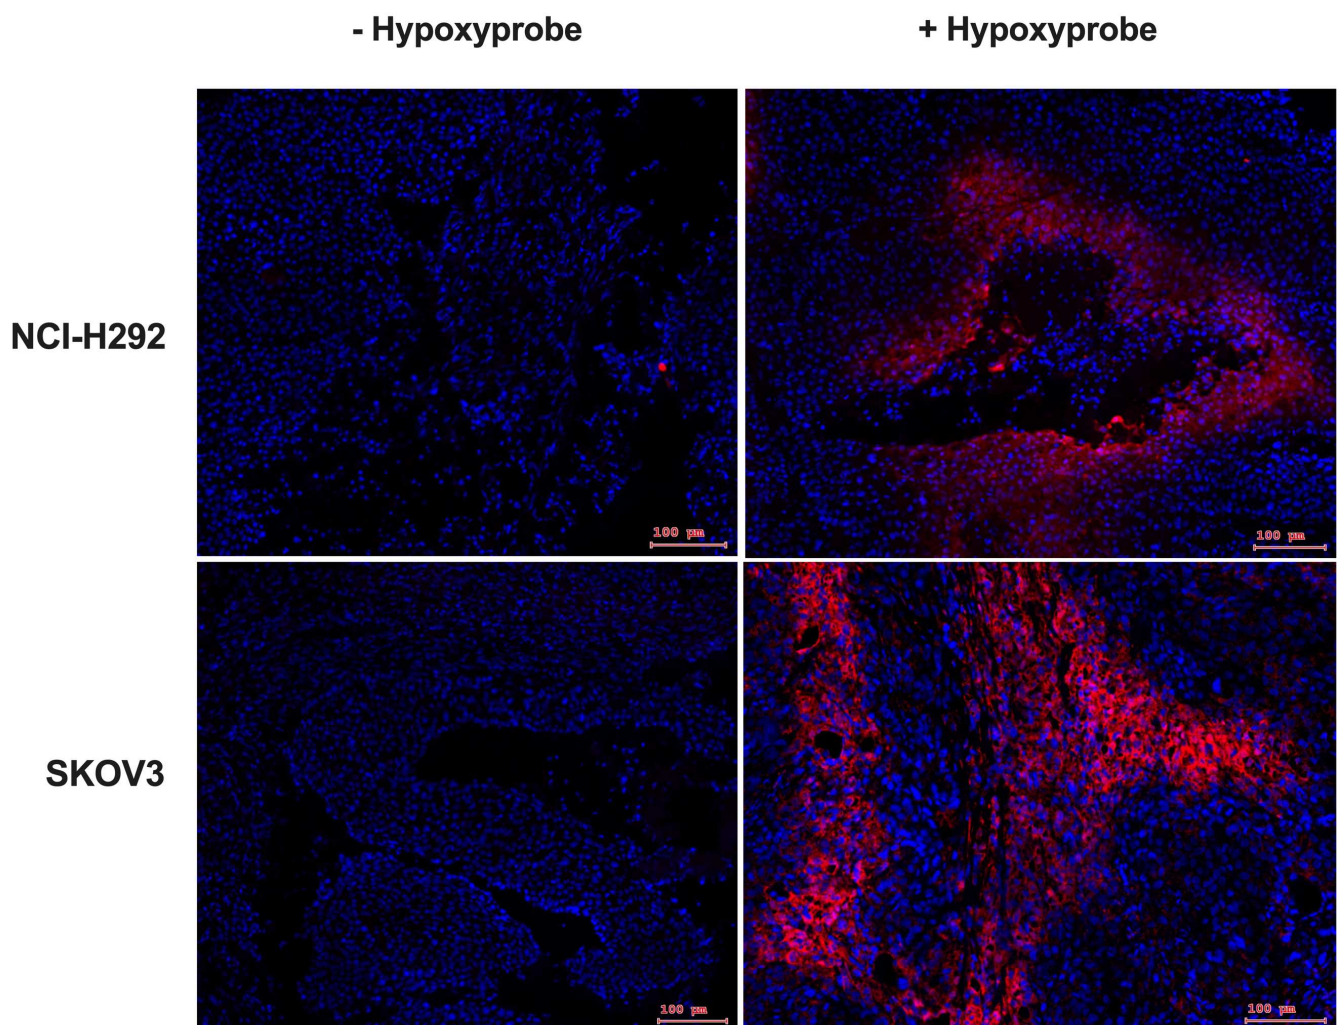

Supplement: jitc-2021-002755supp009.pdf [file jitc-2021-002755supp009.pdf]
